# Supplementary material
Source: MDPI journal article supplement (https://www.mdpi.com/2076-3417/12/23/11894)
Supplement: s1 [file s1]

**Age Categories\_4 = Senior**

| a                            | Igralno mesto_4pos |      |                    |           |      |                    |       |      |                    |       |      |                    |
|------------------------------|--------------------|------|--------------------|-----------|------|--------------------|-------|------|--------------------|-------|------|--------------------|
|                              | Goalkeeper         |      |                    | Backcourt |      |                    | Wing  |      |                    | Pivot |      |                    |
|                              | Count              | Mean | Standard Deviation | Count     | Mean | Standard Deviation | Count | Mean | Standard Deviation | Count | Mean | Standard Deviation |
| S5                           | 12                 | 1.1  | .0                 | 40        | 1.1  | .1                 | 22    | 1.1  | .2                 | 12    | 1.1  | .1                 |
| S10                          | 12                 | 1.9  | .0                 | 40        | 1.8  | .1                 | 22    | 1.9  | .6                 | 12    | 1.9  | .1                 |
| S20                          | 12                 | 3.2  | .1                 | 40        | 3.1  | .1                 | 22    | 3.1  | .1                 | 12    | 3.2  | .1                 |
| a. Age Categories_4 = Senior |                    |      |                    |           |      |                    |       |      |                    |       |      |                    |

**Age Categories\_4 = U17**

| a                         | Igralno mesto_4pos |      |                    |           |      |                    |       |      |                    |       |      |                    |
|---------------------------|--------------------|------|--------------------|-----------|------|--------------------|-------|------|--------------------|-------|------|--------------------|
|                           | Goalkeeper         |      |                    | Backcourt |      |                    | Wing  |      |                    | Pivot |      |                    |
|                           | Count              | Mean | Standard Deviation | Count     | Mean | Standard Deviation | Count | Mean | Standard Deviation | Count | Mean | Standard Deviation |
| S5                        | 58                 | 1.1  | .1                 | 217       | 1.1  | .1                 | 92    | 1.1  | .1                 | 70    | 1.1  | .1                 |
| S10                       | 58                 | 1.9  | .1                 | 217       | 1.9  | .1                 | 92    | 1.9  | .1                 | 70    | 1.9  | .1                 |
| S20                       | 58                 | 3.2  | .1                 | 217       | 3.1  | .1                 | 92    | 3.1  | .1                 | 70    | 3.2  | .1                 |
| a. Age Categories_4 = U17 |                    |      |                    |           |      |                    |       |      |                    |       |      |                    |

**Age Categories\_4 = U19**

| a                         | Igralno mesto_4pos |      |                    |           |      |                    |       |      |                    |       |      |                    |
|---------------------------|--------------------|------|--------------------|-----------|------|--------------------|-------|------|--------------------|-------|------|--------------------|
|                           | Goalkeeper         |      |                    | Backcourt |      |                    | Wing  |      |                    | Pivot |      |                    |
|                           | Count              | Mean | Standard Deviation | Count     | Mean | Standard Deviation | Count | Mean | Standard Deviation | Count | Mean | Standard Deviation |
| S5                        | 50                 | 1.1  | .1                 | 185       | 1.1  | .1                 | 86    | 1.1  | .1                 | 46    | 1.1  | .1                 |
| S10                       | 50                 | 1.9  | .1                 | 185       | 1.8  | .1                 | 86    | 1.8  | .1                 | 46    | 1.9  | .1                 |
| S20                       | 50                 | 3.2  | .1                 | 185       | 3.1  | .1                 | 86    | 3.0  | .1                 | 46    | 3.2  | .1                 |
| a. Age Categories_4 = U19 |                    |      |                    |           |      |                    |       |      |                    |       |      |                    |

**Age Categories\_4 = U21**

| a                         | Igralno mesto_4pos |      |                    |           |      |                    |       |      |                    |       |      |                    |
|---------------------------|--------------------|------|--------------------|-----------|------|--------------------|-------|------|--------------------|-------|------|--------------------|
|                           | Goalkeeper         |      |                    | Backcourt |      |                    | Wing  |      |                    | Pivot |      |                    |
|                           | Count              | Mean | Standard Deviation | Count     | Mean | Standard Deviation | Count | Mean | Standard Deviation | Count | Mean | Standard Deviation |
| S5                        | 30                 | 1.1  | .1                 | 80        | 1.1  | .1                 | 43    | 1.1  | .1                 | 23    | 1.1  | .1                 |
| S10                       | 30                 | 1.9  | .1                 | 80        | 1.8  | .1                 | 43    | 1.8  | .1                 | 23    | 1.9  | .1                 |
| S20                       | 30                 | 3.2  | .1                 | 80        | 3.1  | .1                 | 43    | 3.0  | .1                 | 23    | 3.2  | .1                 |
| a. Age Categories_4 = U21 |                    |      |                    |           |      |                    |       |      |                    |       |      |                    |
